# Supplementary material for: Quantitative analysis of the Brucella suis proteome reveals metabolic adaptation to long-term nutrient starvation
Source: PubMed Central journal article supplement (PMC3844638; doi:10.1186/1471-2180-13-199), 2013-09-04
Supplement: 1471-2180-13-199-S1.pdf [file 1471-2180-13-199-S1.pdf]

pl 4-7; UP

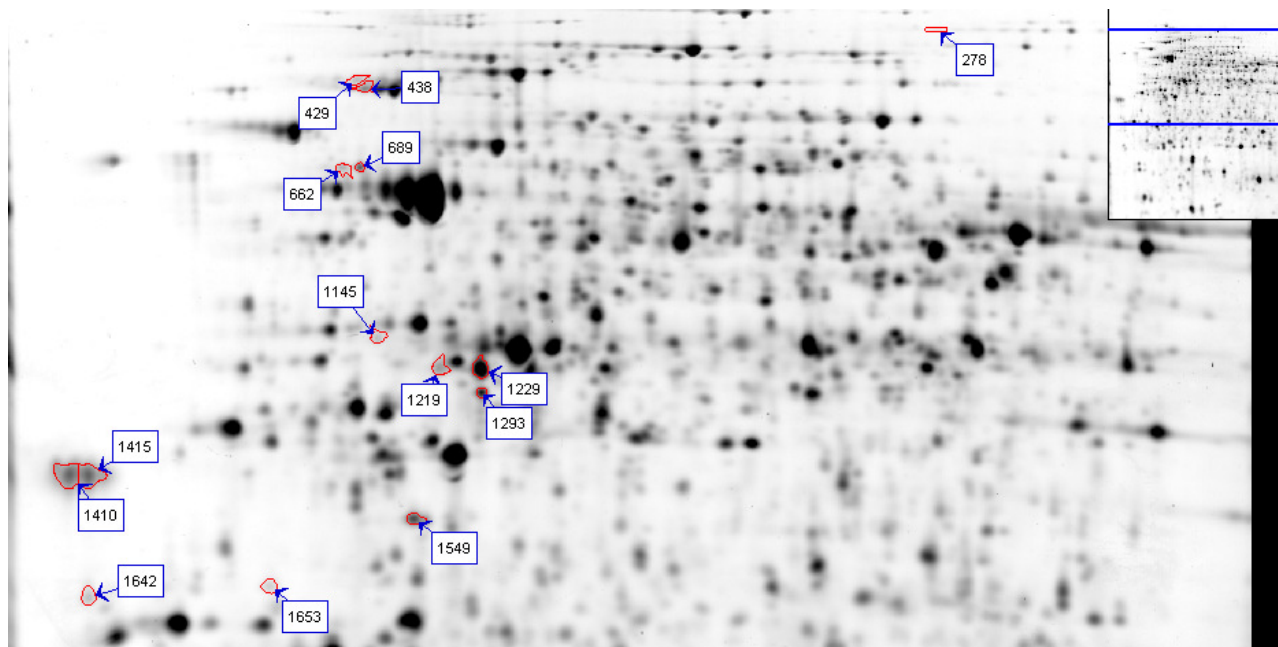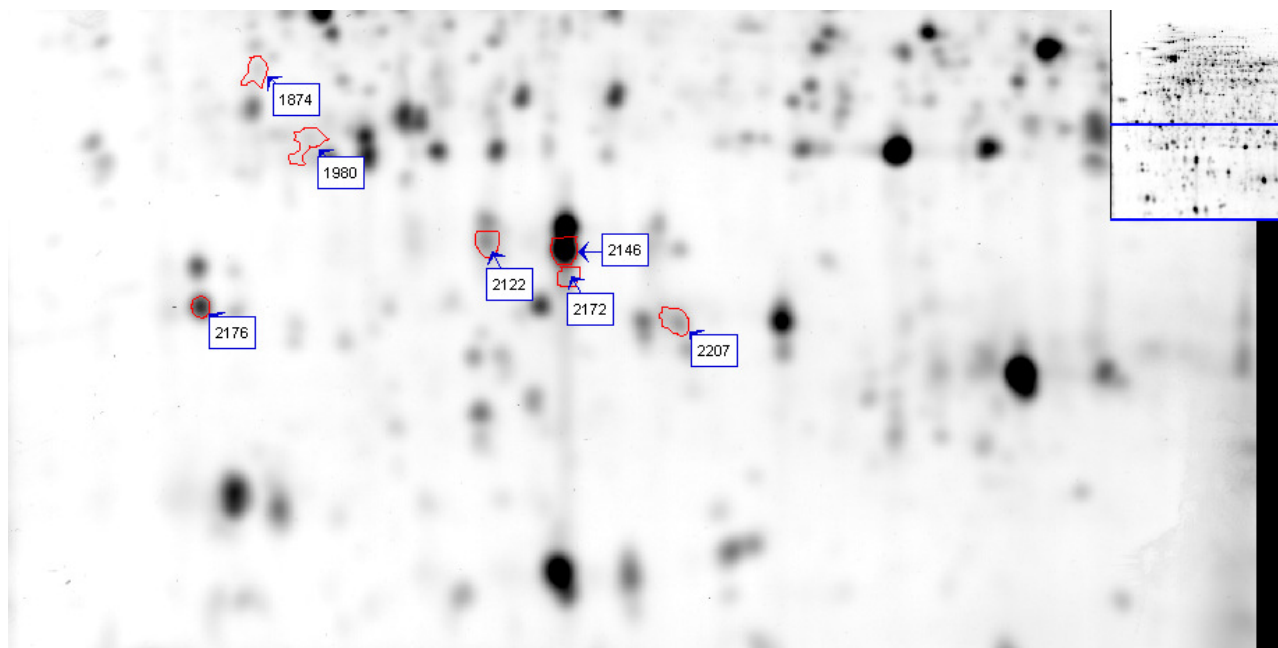

Additional file 1 A  
Supplementary to Fig. 2 A

pl 6-11; UP

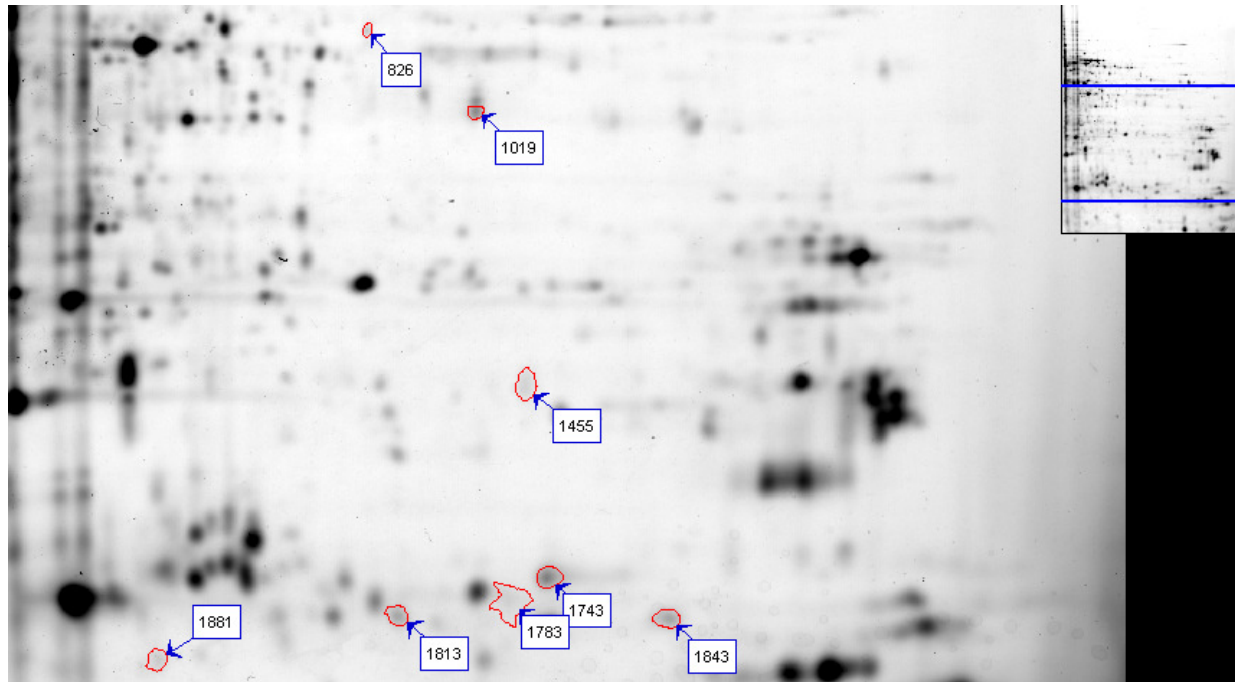

Additional file 1 B  
Supplementary to Fig. 2 B
