# Supplementary material for: Quantitative analysis of the Brucella suis proteome reveals metabolic adaptation to long-term nutrient starvation
Source: PubMed Central journal article supplement (PMC3844638; doi:10.1186/1471-2180-13-199), 2013-09-04
Supplement: 1471-2180-13-199-S2.pdf [file 1471-2180-13-199-S2.pdf]

pl 4-7; DOWN

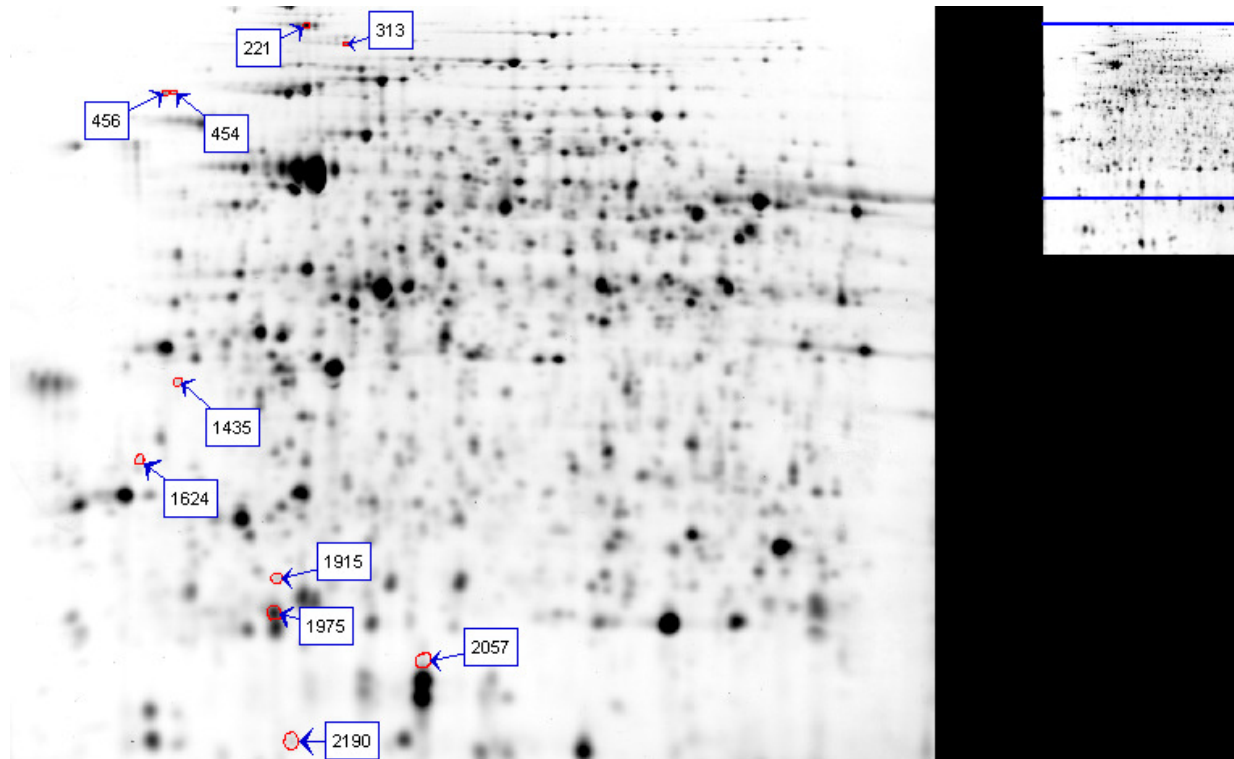

Additional file 2  
Supplementary to Fig. 3
